# Supplementary material
Source: Research Square preprint supplement (doi:10.21203/rs.3.rs-9678844/v1)

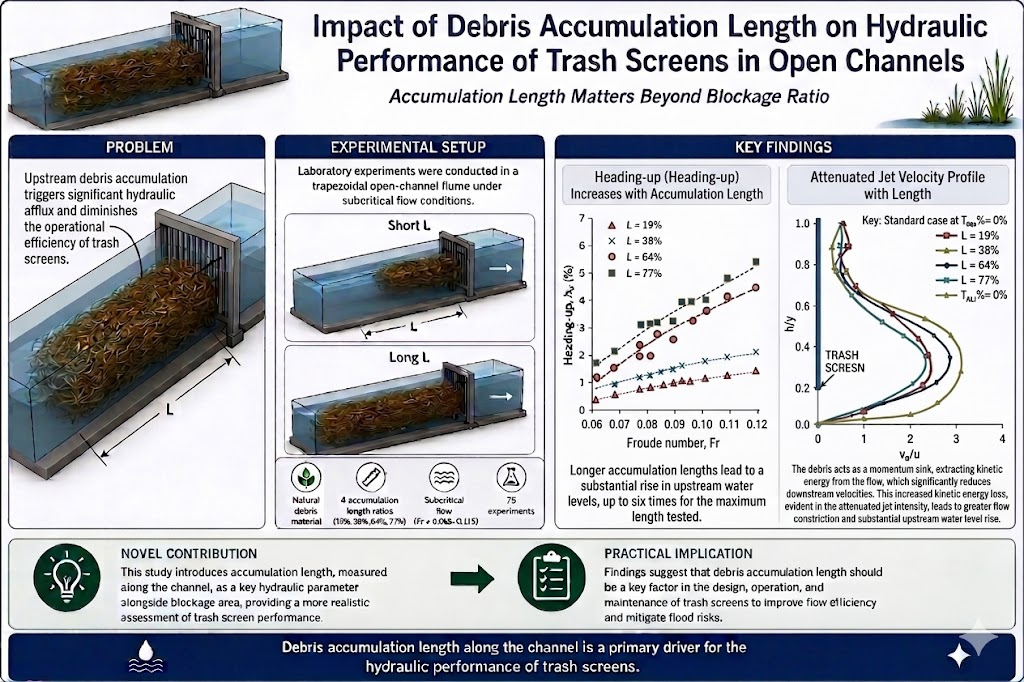

Supplement: Supplementary file 1 [file 0d14f39f5d5ac2d354ae402e.docx]
